# Supplementary material for: Unraveling the influence of organic cations on tuning electronic structures and spin-splitting in two-dimensional layered organic–inorganic tin-iodine perovskites
Source: Royal Society of Chemistry journal article supplement (doi:10.1039/d4cp02426e), 2024-01-01
Supplement: d4cp02426e1.pdf [file d4cp02426e1.pdf]

## Supporting Information

### **Unraveling the Influence of Organic Cations on Tuning Electronic Structures and Spin-Splitting in Two-Dimensional Layered Organic–Inorganic Tin-Iodine Perovskites**

Abdesslem Jedidi\*<sup>1</sup>, Shatha M. Alamri<sup>1</sup>, Norah O. Alotaibi<sup>1</sup>, Souraya Goumri-Said<sup>2</sup>, Mohammed Benali Kanoun\*<sup>3</sup>

<sup>1</sup> *Chemistry Department, Faculty of Science, King Abdulaziz University, Jeddah, 21589, Saudi Arabia*

<sup>2</sup> *College of Science, Physics Department, Alfaisal University, P.O. Box 50927, Riyadh 11533, Saudi Arabia*

<sup>3</sup> *Department of Mathematics and Sciences, College of Humanities and Sciences, Prince Sultan University, P.O. Box 66833, Riyadh 11586, Saudi Arabia*

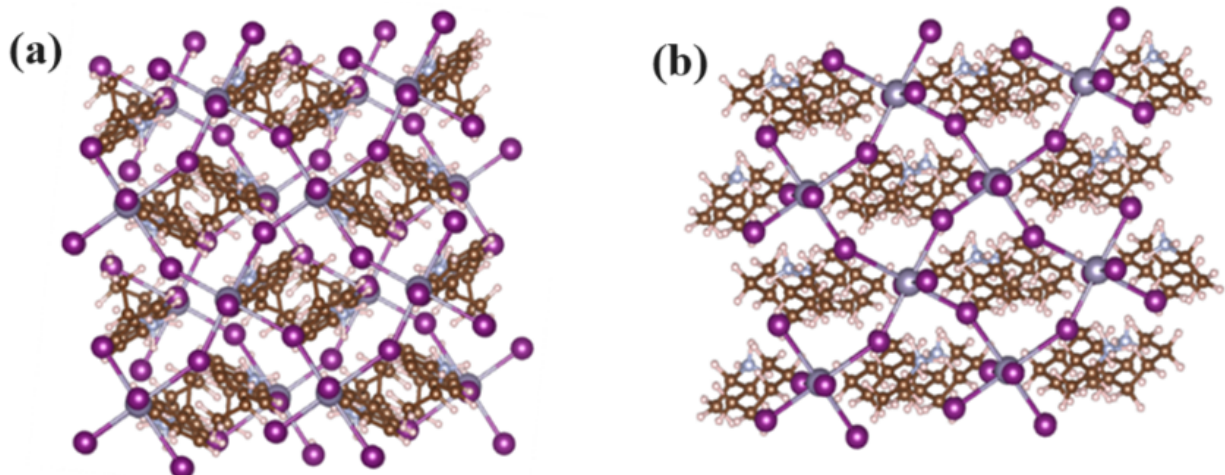

Figure S1. a-b) Top view of (S-MBA)<sub>2</sub>SnI<sub>4</sub>, and (S-CYHEA)<sub>2</sub>SnI<sub>4</sub> crystals, respectively, showing staggered configuration for (S-MBA)<sub>2</sub>SnI<sub>4</sub>, and eclipsed configuration for (S-CYHEA)<sub>2</sub>SnI<sub>4</sub>.

**Table S1:** Sn-I bond lengths for (S-MBA)<sub>2</sub>SnI<sub>4</sub>, and (S-CYHEA)<sub>2</sub>SnI<sub>4</sub> and their average of distortions.

| Compound                                | Bond                   | Length (Å) | $\Delta d$             |
|-----------------------------------------|------------------------|------------|------------------------|
| (S-MBA) <sub>2</sub> SnI <sub>4</sub>   | Sn-I <sub>ax</sub> (1) | 3.186 Å    | $2.701 \times 10^{-3}$ |
|                                         | Sn-I <sub>ax</sub> (4) | 3.156 Å    |                        |
|                                         | Sn-I <sub>eq</sub> (2) | 3.100 Å    |                        |
|                                         | Sn-I <sub>eq</sub> (3) | 3.048 Å    |                        |
|                                         | Sn-I <sub>eq</sub> (5) | 3.514 Å    |                        |
|                                         | Sn-I <sub>eq</sub> (6) | 3.408 Å    |                        |
| (S-CYHEA) <sub>2</sub> SnI <sub>4</sub> | Sn-I <sub>ax</sub> (1) | 3.143 Å    | $2.124 \times 10^{-3}$ |
|                                         | Sn-I <sub>ax</sub> (4) | 3.430 Å    |                        |
|                                         | Sn-I <sub>eq</sub> (2) | 3.265 Å    |                        |
|                                         | Sn-I <sub>eq</sub> (3) | 3.365 Å    |                        |
|                                         | Sn-I <sub>eq</sub> (5) | 3.043 Å    |                        |
|                                         | Sn-I <sub>eq</sub> (6) | 3.054 Å    |                        |

**Table S2:** I-Sn-I bond angle for (S-MBA)<sub>2</sub>SnI<sub>4</sub> and (S-CYHEA)<sub>2</sub>SnI<sub>4</sub> and their average of distortions.

| Compound                                  | Bond                                         | Angle (deg)                              | $\sigma^2$ (deg <sup>2</sup> ) |
|-------------------------------------------|----------------------------------------------|------------------------------------------|--------------------------------|
| <b>(S-MBA)<sub>2</sub>SnI<sub>4</sub></b> | I <sub>(1)</sub> - Sn - I <sub>(2)</sub>     | 85.33°                                   | 9.10                           |
|                                           | I <sub>(1)</sub> - Sn - I <sub>(3)</sub>     | 91.64°                                   |                                |
|                                           | I <sub>(1)</sub> - Sn - I <sub>(5)</sub>     | 92.60°                                   |                                |
|                                           | I <sub>(1)</sub> - Sn - I <sub>(6)</sub>     | 87.53°                                   |                                |
|                                           | I <sub>(4)</sub> - Sn - I <sub>(2)</sub>     | 86.79°                                   |                                |
|                                           | I <sub>(4)</sub> - Sn - I <sub>(3)</sub>     | 92.22°                                   |                                |
|                                           | I <sub>(4)</sub> - Sn - I <sub>(5)</sub>     | 95.15°                                   |                                |
|                                           | I <sub>(4)</sub> - Sn - I <sub>(6)</sub>     | 88.55°                                   |                                |
|                                           | I <sub>(2)</sub> - Sn - I <sub>(3)</sub>     | 92.71°                                   |                                |
|                                           | I <sub>(2)</sub> - Sn - I <sub>(6)</sub>     | 86.97°                                   |                                |
|                                           | I <sub>(3)</sub> - Sn - I <sub>(5)</sub>     | 89.05°                                   |                                |
|                                           | I <sub>(5)</sub> - Sn - I <sub>(6)</sub>     | 91.23°                                   |                                |
|                                           | <b>(S-CYHEA)<sub>2</sub>-SnI<sub>4</sub></b> | I <sub>(1)</sub> - Sn - I <sub>(2)</sub> |                                |
| I <sub>(1)</sub> - Sn - I <sub>(3)</sub>  |                                              | 95.86°                                   |                                |
| I <sub>(1)</sub> - Sn - I <sub>(5)</sub>  |                                              | 89.45°                                   |                                |
| I <sub>(1)</sub> - Sn - I <sub>(6)</sub>  |                                              | 85.03°                                   |                                |
| I <sub>(4)</sub> - Sn - I <sub>(2)</sub>  |                                              | 87.83°                                   |                                |
| I <sub>(4)</sub> - Sn - I <sub>(3)</sub>  |                                              | 93.77°                                   |                                |
| I <sub>(4)</sub> - Sn - I <sub>(5)</sub>  |                                              | 93.71°                                   |                                |
| I <sub>(4)</sub> - Sn - I <sub>(6)</sub>  |                                              | 85.33°                                   |                                |
| I <sub>(2)</sub> - Sn - I <sub>(3)</sub>  |                                              | 91.37°                                   |                                |
| I <sub>(2)</sub> - Sn - I <sub>(6)</sub>  |                                              | 88.76°                                   |                                |
| I <sub>(3)</sub> - Sn - I <sub>(5)</sub>  |                                              | 89.86°                                   |                                |
| I <sub>(5)</sub> - Sn - I <sub>(6)</sub>  |                                              | 90.01°                                   |                                |

**Table S3:** Hydrogen bond for (S- MBA)<sub>2</sub>SnI<sub>4</sub> and (S- CYHEA)<sub>2</sub>SnI<sub>4</sub>

| <b>Compound</b>                             | <b>H-bond</b>        | <b>Length (Å)</b> |
|---------------------------------------------|----------------------|-------------------|
| <b>(S-MBA)<sub>2</sub>SnI<sub>6</sub></b>   | NH···I <sub>eq</sub> | 2.89 Å            |
|                                             | NH···I <sub>eq</sub> | 3.06 Å            |
|                                             | NH···I <sub>ax</sub> | 2.49 Å            |
|                                             | NH···I <sub>ax</sub> | 2.65 Å            |
|                                             | NH···I <sub>ax</sub> | 2.48 Å            |
|                                             | NH···I <sub>ax</sub> | 2.61 Å            |
| <b>(S-CYHEA)<sub>2</sub>SnI<sub>6</sub></b> | NH···I <sub>eq</sub> | 2.85 Å            |
|                                             | NH···I <sub>eq</sub> | 2.69 Å            |
|                                             | NH···I <sub>ax</sub> | 2.45 Å            |
|                                             | NH···I <sub>ax</sub> | 2.60 Å            |
|                                             | NH···I <sub>ax</sub> | 2.57 Å            |
|                                             | NH···I <sub>ax</sub> | 2.41 Å            |

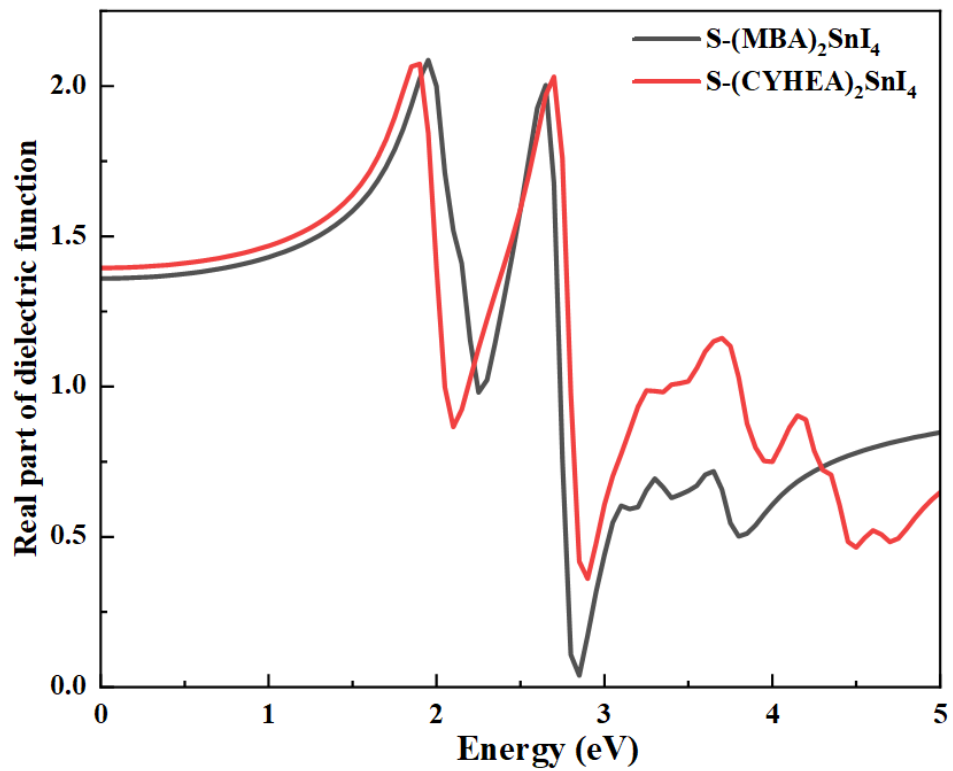

**Figure S2.** The real part of the dielectric function of S-(MBA)<sub>2</sub>SnI<sub>4</sub> and S-(CYHEA)<sub>2</sub>SnI<sub>4</sub>

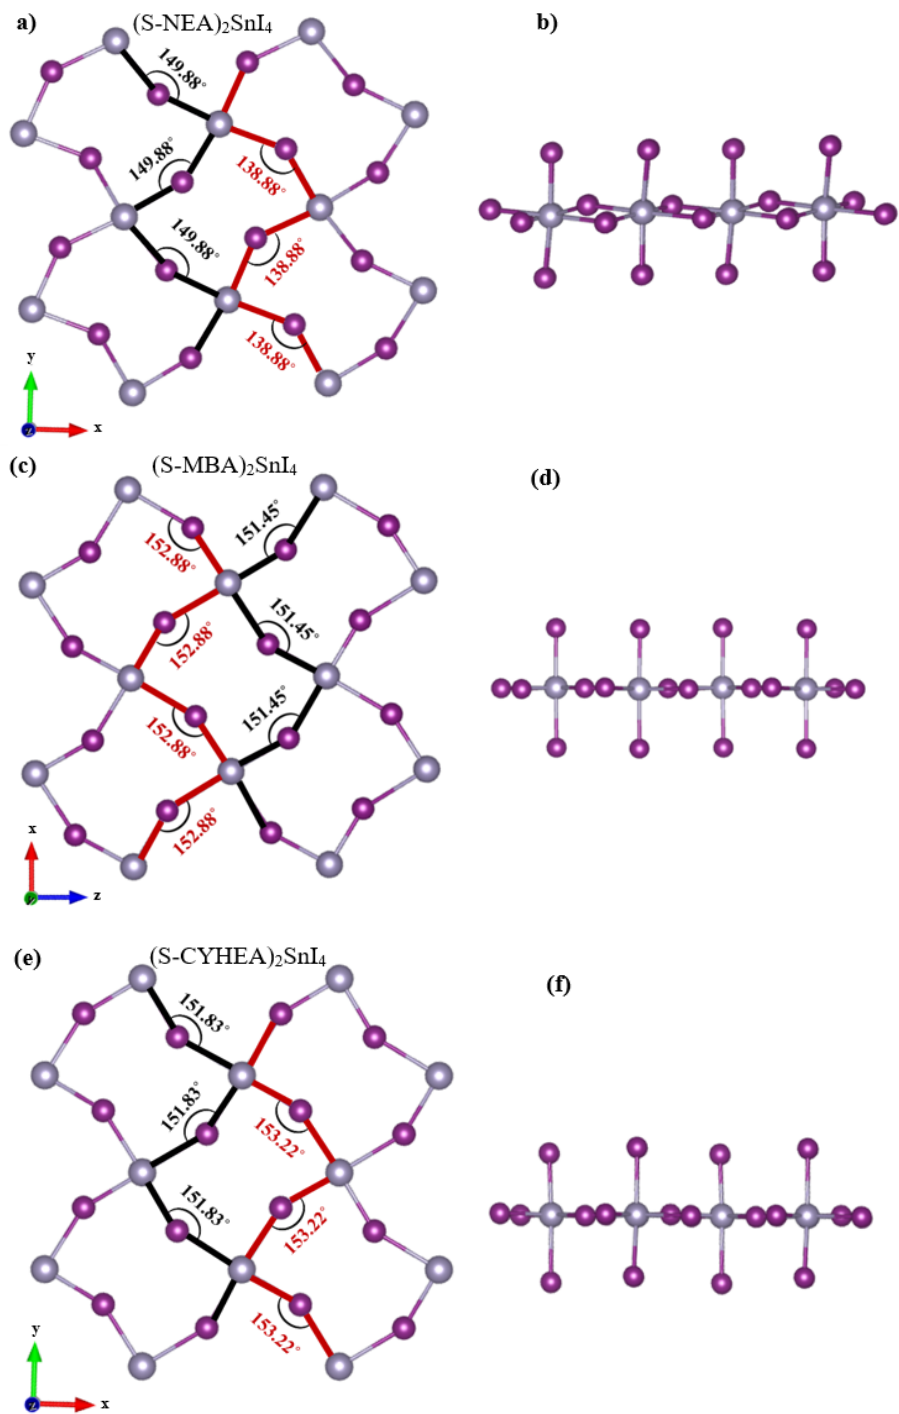

**Figure S3:** Illustration of the bond angle labels used in geometry comparison between perovskites in a)  $S-(NEA)_2SnI_4$  show two different bond angles. In contrast (c)  $S-(MBA)_2SnI_4$  and (e)  $S-(CYHEA)_2SnI_4$  exhibit two very similar bond angles, denoted as red and black colors. b, c and f) Side view of the inorganic layer.

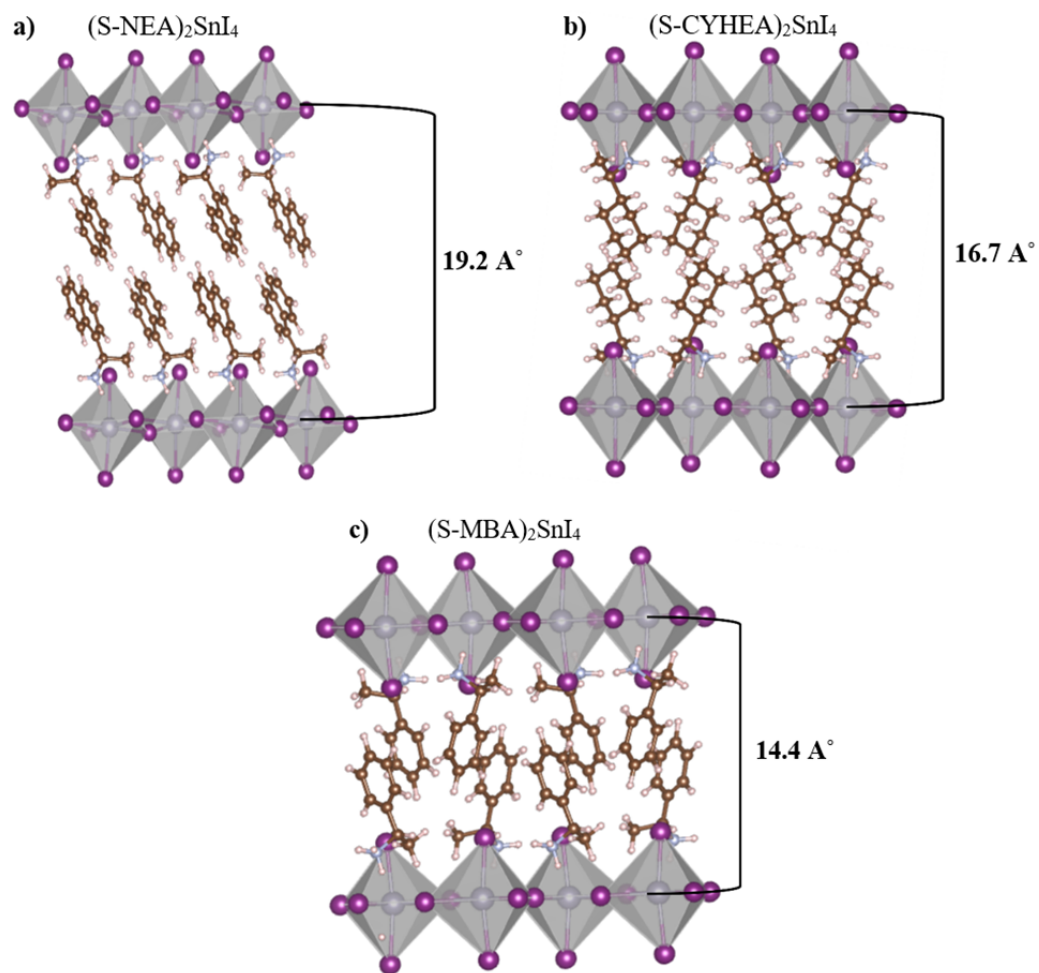

**Figure S4:** Schematic illustration of d-spacing between inorganic layers for a) (NEA)<sub>2</sub>SnI<sub>4</sub>; b) S-(CYHEA)<sub>2</sub>SnI<sub>4</sub>; and c) S-(MBA)<sub>2</sub>SnI<sub>4</sub>.
